# Supplementary material
Source: PubMed Central journal article supplement (PMC4631151)

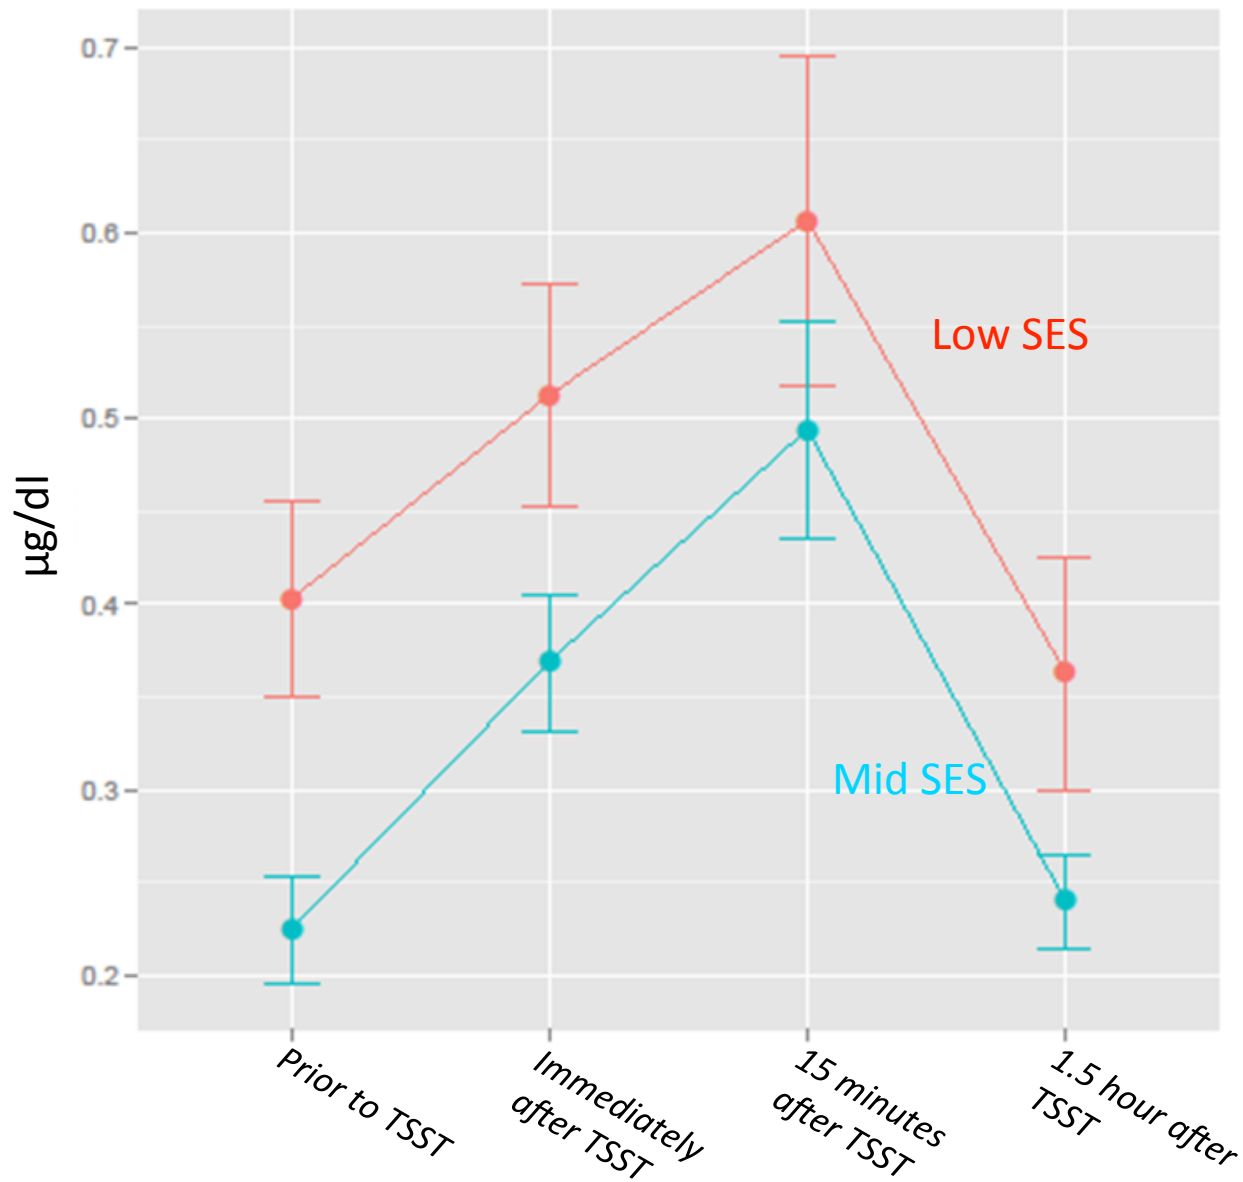

Figure S1

Supplement: supp_nsv045_scan-14-247-File006.pdf [file supp_nsv045_scan-14-247-File006.pdf]
